# Supplementary material for: Comprehensive Virulence Gene Profiling of Bovine Non-aureus Staphylococci Based on Whole-Genome Sequencing Data
Source: PubMed Central journal article supplement (PMC6401416; doi:10.1128/msystems.00098-18), 2019-03-05

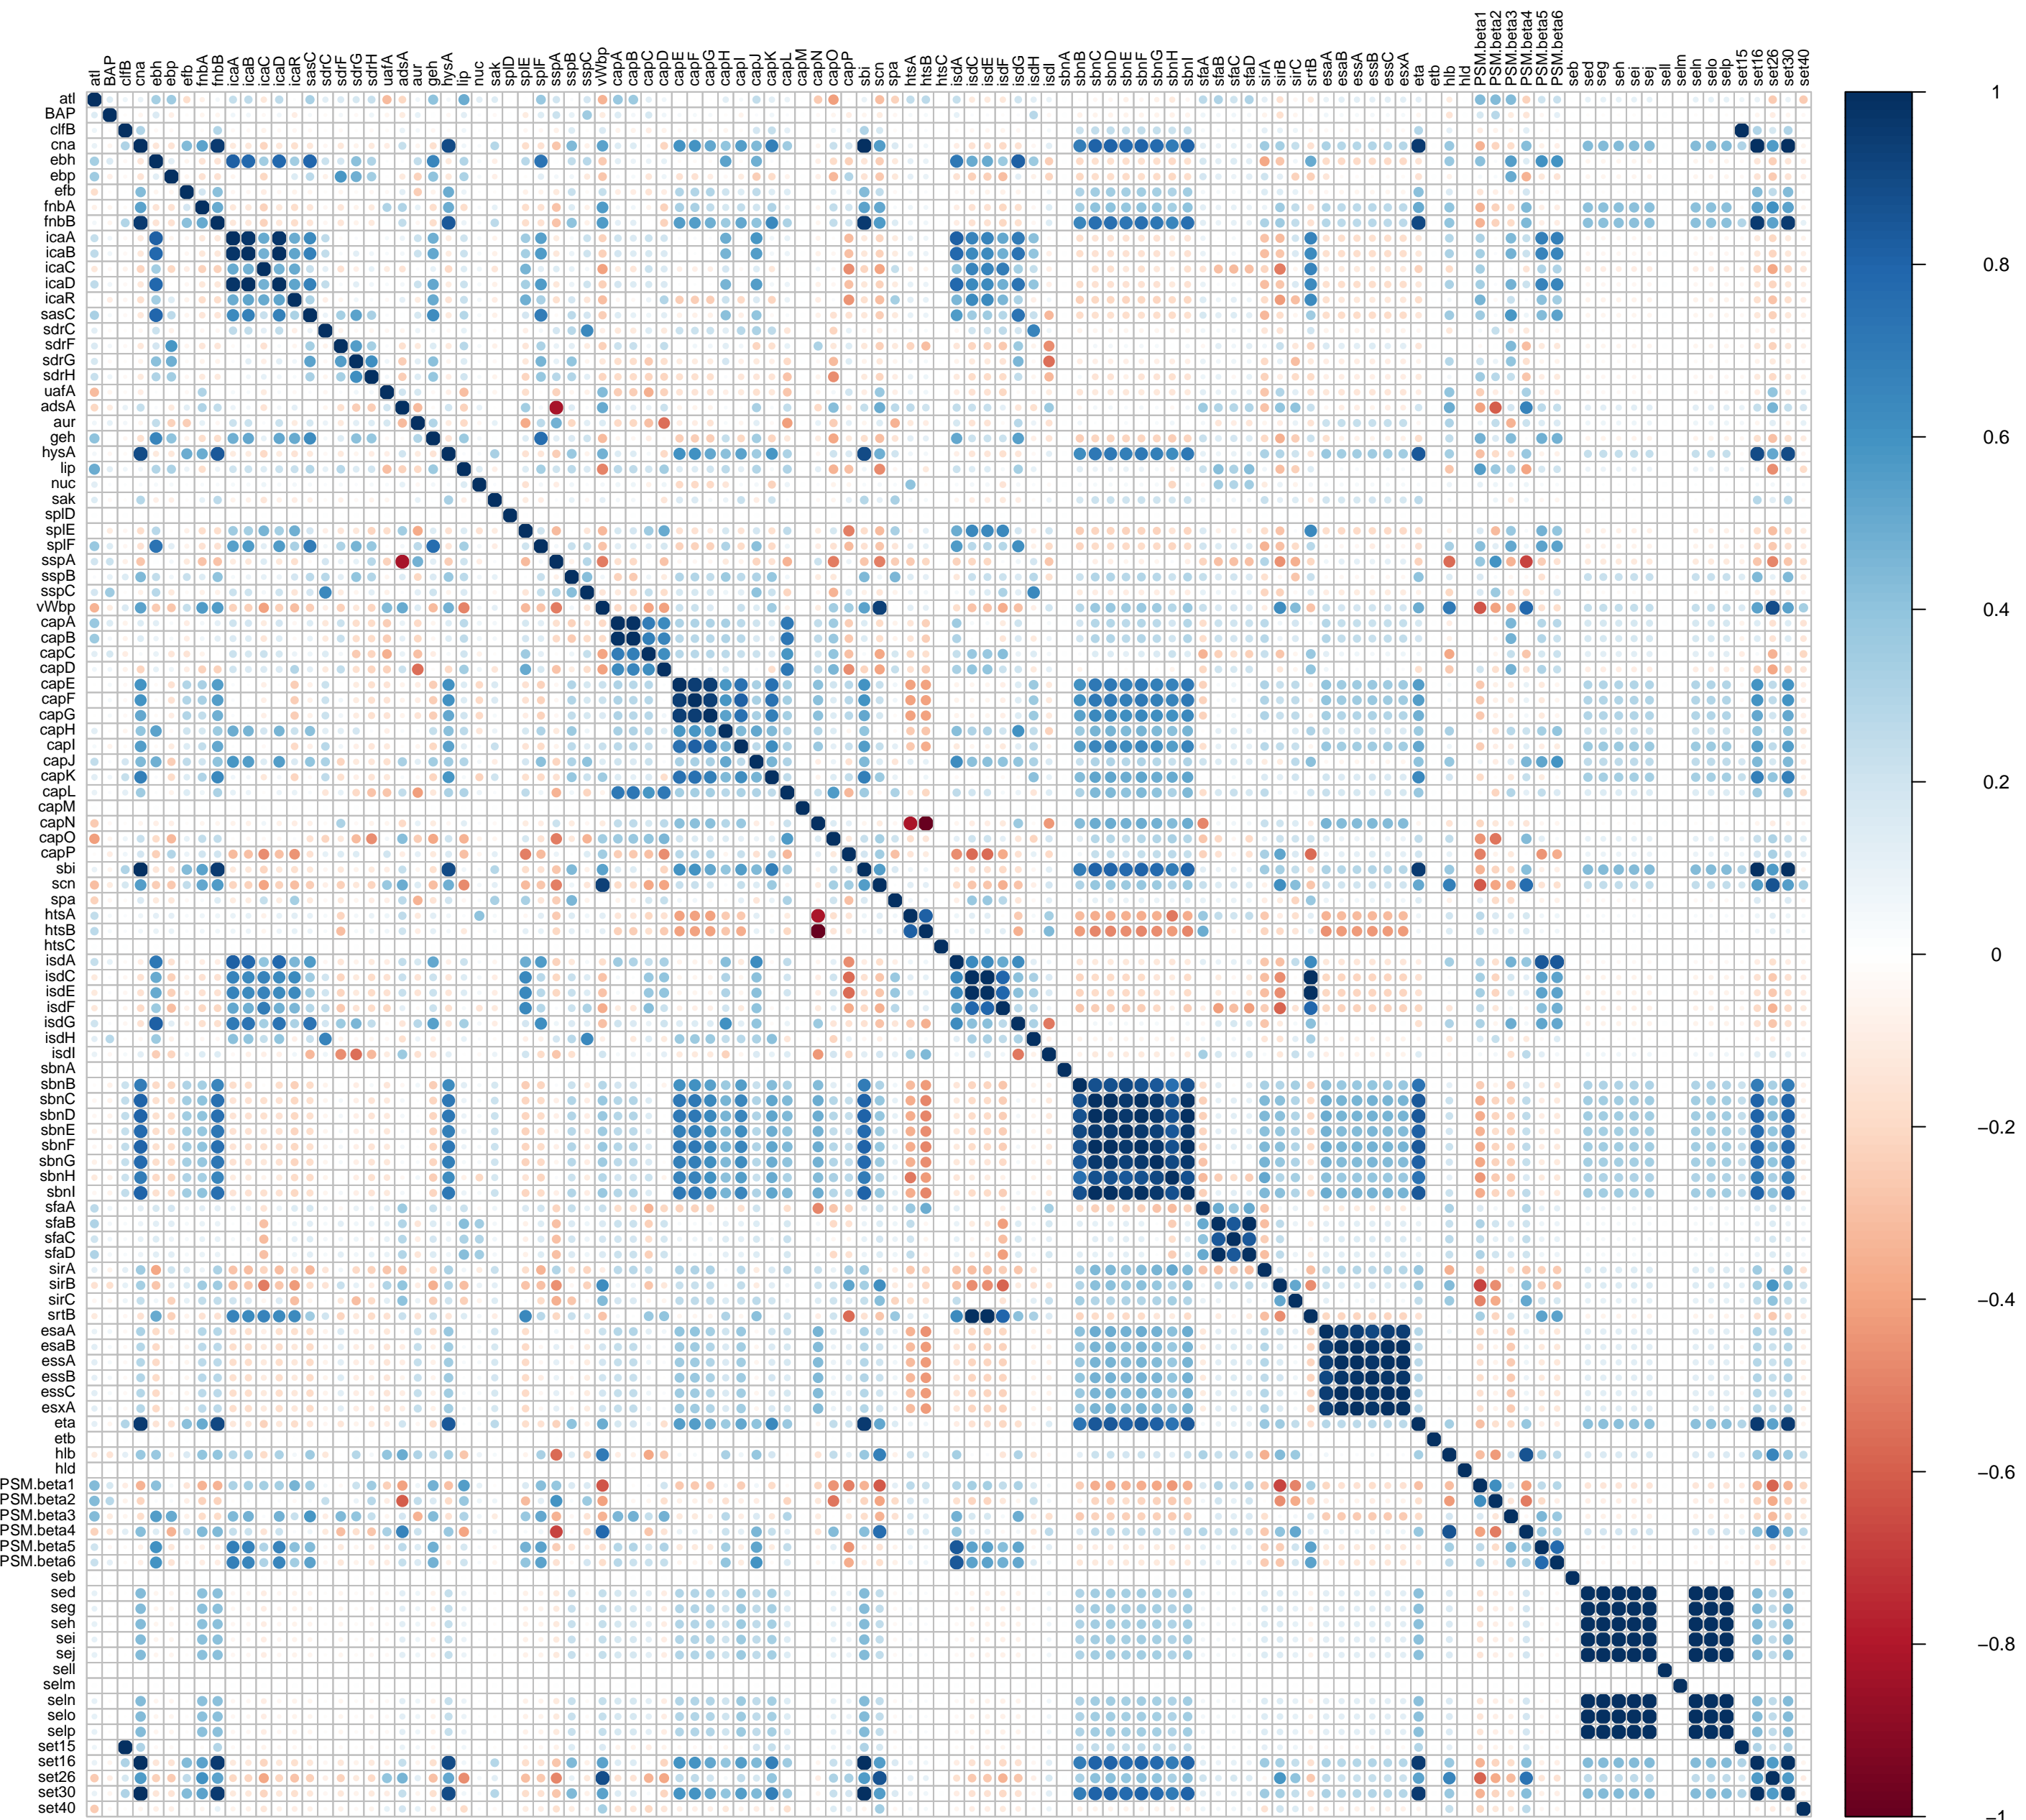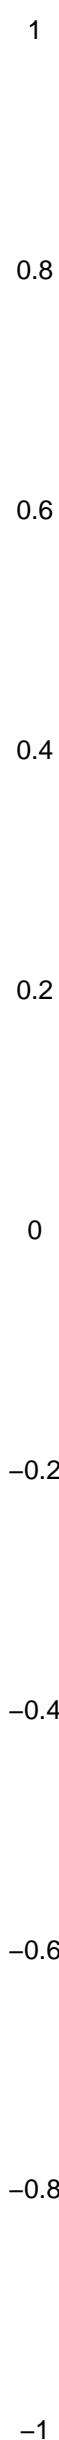

Supplement: mSystems.00098-18-sf002.pdf [file mSystems.00098-18-sf002.pdf]
